# Supplementary material
Source: PubMed Central journal article supplement (PMC7141904)
Supplement: 10-1055-s-0040-1708050-s190233ra.pdf [file 10-1055-s-0040-1708050-s190233ra.pdf]

## Supplementary Material

**Table 1** Population pharmacokinetics models integrated into the clinical decision support tool

| Study (year)                            | Factor | Formulations                                                                    |
|-----------------------------------------|--------|---------------------------------------------------------------------------------|
| Abrantes <sup>1</sup> (2017)            | VIII   | ReFacto, ReFacto AF, Xyntha                                                     |
| Zhang <sup>2</sup> (2017)               | VIII   | rVIII-SingleChain                                                               |
| Garmann <sup>3</sup> (2017)             | VIII   | BAY 81–8973                                                                     |
| Hazendonk <sup>4</sup> (2016)           | VIII   | Kogenate FS, Helixate FS, Advate, Recombinate, Refacto AF, Aafact, Hemofil M    |
| Björkman <sup>5</sup> (2009)            | VIII   | Immunate, Monoclate, Monoclate-P, Octonativ-M, Kogenate, Recombinate, ReFacto   |
| Björkman <sup>6</sup> (2017)            | VIII   | Advate                                                                          |
| Bolon-Larger <sup>7</sup> (2007)        | VIII   | Not specified (plasma-derived or rDNA factor VIII concentrate)                  |
| Suzuki <sup>8</sup> (2016)              | IX     | Not specified (recombinant factor IX)                                           |
| Brekkan <sup>9</sup> (2016)             | IX     | AlphaNine, Factor IX Grifols, Immunine, Octanine, Nanotiv, Preconativ, Mononine |
| Diao <sup>10</sup> (2014)               | IX     | Not specified                                                                   |
| Björkman and Ahlén <sup>11</sup> (2017) | IX     | Replenine-VF, Preconativ, Nanotiv, Mononine, Replenine, Alphanine               |
| Björkman <sup>12</sup> (2017)           | IX     | Not specified (recombinant factor IX)                                           |

### Supplement References

- Abrantes JA, Nielsen EI, Korth-Bradley J, Harnisch L, Jönsson S. Elucidation of factor VIII activity pharmacokinetics: a pooled population analysis in patients with hemophilia A treated with moroctocog alfa. *ClinPharmacolTher* 2017;102(06):977–988
- Zhang Y, Roberts J, Tortorici M, et al. Population pharmacokinetics of recombinant coagulation factor VIII-SingleChain in patients with severe hemophilia A. *J ThrombHaemost* 2017;15(06):1106–1114
- Garmann D, McLeay S, Shah A, Vis P, Maas Enriquez M, Ploeger BA. Population pharmacokinetic characterization of BAY 81–8973, a full-length recombinant factor VIII: lessons learned - importance of including samples with factor VIII levels below the quantitation limit. *Haemophilia* 2017;23(04):528–537
- Hazendonk H, Fijnvandraat K, Lock J, et al; "OPTI-CLOT" study group. A population pharmacokinetic model for perioperative dosing of factor VIII in hemophilia A patients. *Haematologica* 2016;101(10):1159–1169
- Björkman S, Folkesson A, Jönsson S. Pharmacokinetics and dose requirements of factor VIII over the age range 3–74 years: a population analysis based on 50 patients with long-term prophylactic treatment for haemophilia A. *Eur J ClinPharmacol* 2009;65(10):989–998
- Björkman S, Oh M, Spotts G, et al. Population pharmacokinetics of recombinant factor VIII: the relationships of pharmacokinetics to age and body weight. *Blood* 2012;119(02):612–618
- Bolon-Larger M, Chamouard V, Bressolle F, Bouliou R. A limited sampling strategy for estimating individual pharmacokinetic parameters of coagulation factor VIII in patients with hemophilia A. *Ther Drug Monit* 2007;29(01):20–26
- Suzuki A, Tomono Y, Korth-Bradley JM. Population pharmacokinetic modelling of factor IX activity after administration of recombinant factor IX in patients with haemophilia B. *Haemophilia* 2016;22(05):e359–e366
- Brekkan A, Berntorp E, Jensen K, Nielsen EI, Jönsson S. Population pharmacokinetics of plasma-derived factor IX: procedures for dose individualization. *J ThrombHaemost* 2016;14(04):724–732
- Diao L, Li S, Ludden T, Gobburu J, Nestorov I, Jiang H. Population pharmacokinetic modelling of recombinant factor IX Fc fusion protein (rFIXFc) in patients with haemophilia B. *ClinPharmacokinetic* 2014;53(05):467–477
- Björkman S, Ahlén V. Population pharmacokinetics of plasma-derived factor IX in adult patients with haemophilia B: implications for dosing in prophylaxis. *Eur J ClinPharmacol* 2012;68(06):969–977
- Björkman S. Population pharmacokinetics of recombinant factor IX: implications for dose tailoring. *Haemophilia* 2013;19(05):753–757
